# Supplementary material for: Structural variation at the maize WUSCHEL1 locus alters stem cell organization in inflorescences
Source: PubMed Central journal article supplement (PMC8062686; doi:10.1038/s41467-021-22699-8), 2021-04-22
Supplement: 41467_2021_22699_MOESM1_ESM.pdf [file 41467_2021_22699_MOESM1_ESM.pdf]

## **SUPPLEMENTARY FIGURES**

### **STRUCTURAL VARIATION AT THE MAIZE *WUSCHEL1* LOCUS ALTERS STEM CELL ORGANIZATION IN INFLORESCENCES**

Zongliang Chen, Wei Li, Craig Gaines, Amy Buck, Mary Galli, Andrea Gallavotti

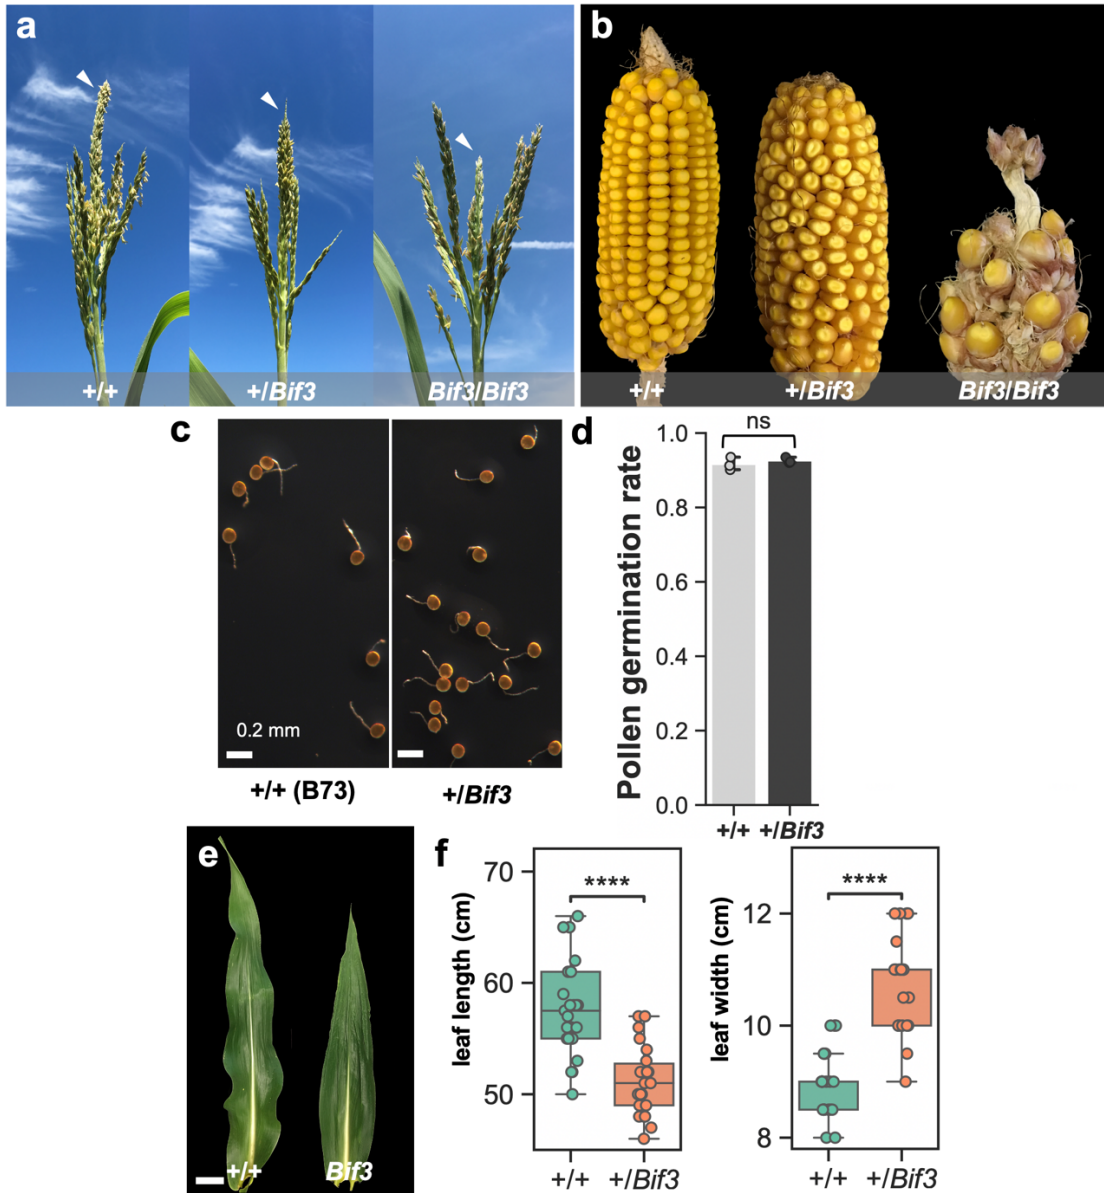

**Supplementary Figure 1.** *Bif3* mutant phenotype. (a) Mature tassel phenotype in B73. Normal tassels produce spikelets and flowers on branches and central spikes. Central spikes are reduced in *Bif3* homozygous mutants. White arrowheads point to the central spikes. (b) Mature ear phenotype in B73. Ears are reduced in size in *Bif3/Bif3* mutants and display disorganized rows of kernels in  $+/Bif3$  mutants. (c,d) Pollen germination in wild type and  $+/Bif3$  mutant in B73. Quantification of germination rate: 91.6% (3 plants, 10 anthers/plant, n=1400 pollen grains) in B73 and 92.6% (3 plants, 10 anthers/plant, n=4952 pollen grains) in  $+/Bif3$  (d); plotted data represent the mean, +/- standard deviation. (e,f) Leaves (the top third ones) from wild type and heterozygous *Bif3* plants in

A619. The *Bif3* leaves are broader in width and shorter in length ( $n_{WT} = 25$ ,  $n_{Bif3} = 22$ , two-tailed Student's *t*-test, \*\*\*\*  $p < 0.0001$ ). Box plot center line, median; box limits, upper and lower quartiles; whiskers, maximum and minimum values. Single datapoints outside of the whiskers represent outliers. Scale bars: 1 cm in **b**, 200  $\mu\text{m}$  in **c**; 5 cm in **e**.





specific primers (*ZmWUS1-A*, 1428WUS-FWD/WUSseqR3; *ZmWUS1-B*, 6968F7/WUSseqR3 in left panels; *ZmWUS1-A*, 1428WUS-FWD/WUS-R; *ZmWUS1-B*, 6968F6/WUS-R in right panels). (c) Chromatograph snapshot of *ZmWUS1-A* and *ZmWUS1-B* start codons in *Bif3-Rev1*. (d) Southern blot analysis of *ZmWUS1*. (e) A normal ear phenotype is observed in *Rev1*, *Rev2* and *Rev3* plants. (f) SEM analysis of *Rev2* ear primordia, showing a regular arrangements of AMs at the IM flanks. Scale bars, 100 $\mu$ m.



873/1-4834 1585 ATACCTTAABTTTC---TTGTATAATTAAGAAATGACACATAACRCATTCATGGCCCTATGTATCTGAC---GGAAATATAGTAATAACAACTCC--TCAAAAATAAGAGACAA 1707  
 873/1-4834 1475 ATCTCTTATAATAAATAGGACTTATAAATTTAGTTAAATAATGATAAATAAGAGCTGGTATTGATTTTATAATCTATAATAAATTAAGACCTTACACCTATAAATAGAGCT 1608  
 K13/1-4364 1461 ATTCTTATAATAAAGATTAGGACTTATAAATTTTAGTTAAATAATGATAAATAAGAGCTGGTATTGATTTTATAATCTATAATAAATTAAGACCTTACACCTATAAATAGAGCT 1594

873/1-4834 1708 TCAATATTCACACTATAAATTTGACAAACATTTTACAAAACATATTTGGCATTTATATATGCCCCAAACACCTACTGATGCATCTCTGATCTAC-----TCCCTCTA--TCCGGCATCTCC 1827  
 873/1-4834 1609 TTTCTTCTGG-----CTCACGTAATAATAGAAAACATTTTCTGTAAATAAATGATTTTATGCAACAGTAAATGTTAA--TACTTTTTCCCTTAAATCTTACAGCGAGCTTGGAAATCTAA 1728  
 K13/1-4364 1595 TTTTCTTCTGG-----CTCACGTAATAATAGAAAACATTTTCTGTAAATAAATGATTTTATGCAACAGTAAATGTTAA--TACTTTTTCCCTTAAATCTTACAGCGAGCTTGGAAATCTAA 1714

873/1-4834 1828 ATCTCTG---TTTACACACCTTTTCCATCTTACTGACCAAGCCGCTTATGCAACAAACCGGATCAGGCTCTTACTGCCTGTGTGATGATCGAAGCTGCTGAAAATGAATGATCTGCTCCAGCGC 1957  
 873/1-4834 1729 TTAACCTTTGGTCAAAAATCTAATGGTCTCTTAAITTTCCGTAGGGGGAC-----GCAATGCTATACAT--AG-----TACGAAAACCTAATTAACCAACTTCGAAAA 1835  
 K13/1-4364 1715 TTAACCTTTGGTCAAAAATCTAATGGTCTCTTAAITTTCCGTAGGGGGAC-----GCAATGCTATACAT--AG-----TACGAAAACCTAATTAACCAACTTCGAAAA 1821

873/1-4834 1054 GGCCTATATCTGCTACTCTTACCTTGGCCACGCTCAGGCCAGCTCAGAGCCTGCTCACTCCTGCTCACTCCGTCCTTCCCTC-----TACTGGCCCTCTTTCAATTTTCTCCACACTGACCTAAC 2086  
 873/1-4834 1836 ---TGGAGCCGATCTCTGATCTAATTCACACCCACACATACGGCCGAGATGACAGCTAGGCTAGCTAGAGAGTGGGCGAGGCAGTACACCCAGCTGTACCTACGACCCACTGGTCTAC 1964  
 K13/1-4364 1822 ---TGGAGCCGATCTCTGATCTAATTCACACCCACACATACGGCCGAGATGACAGCTAGGCTAGAGAGTGGGCGAGGCAGTACACCCAGCTGTACCTACGACCCACTGGTCTAC 1942

873/1-4834 2087 TCTCAGCTCGTTCTTAAAGACCCACCTCACACAGCCAGAGCCAGCTCAGAGCCTTCTTACCTGATGATGATGATGATGATGATGATGATGATGATGATGATGATGATGATGATGAT 2218  
 873/1-4834 1965 GAAAA--ACAAAAGGTGGCCGGGGCCGGAATAT--ATGAGGCTGCTGCGCCGCTACCTAGCTAGCTAGCTAGCTAGCTAGCTAGCTAGCTAGCTAGCTAGCTAGCTAGCTAGCTAGCT 2094  
 K13/1-4364 1943 GAAAA--ACAAAAGGTGGCCGGGGCCGGAATAT--ATGAGGCTGCTGCGCCGCTACCTAGCTAGCTAGCTAGCTAGCTAGCTAGCTAGCTAGCTAGCTAGCTAGCTAGCTAGCTAGCT 2067

873/1-4834 2219 TAATTTAGGGTTTAAATATGTATG---TATAAATATGATATTTTAACT---CTTTTACTGTTAAATAGTATGAAATTAACAGCAATTGATATATTTTGTATATACACATGATACTATTTTTTCT 2350  
 873/1-4834 2095 TATTTCTAGCTCAACTAGCCATAAGCCTAGCCCTCTACCTGTTTGGATCCAAAGGCTAGTTTACAA-----TAAATGCTATTTATAAATCATTTTCTTATTAACCTTTCTTATTCGGATT 2222  
 K13/1-4364 2065 TATTTCTAGCTCAACTAGCCATAAGCCTAGCCCTCTACCTGTTTGGATCCAAAGGCTAGTTTACAA-----TAAATGCTATTTATAAATCATTTTCTTATTAACCTTTCTTATTCGGATT 2195

873/1-4834 2351 GGCCTCCGAGCTTAAACACCCAGCTCAGACTCAGAACAGCCAGCCAGCCAGCTGGTTCTCCTGGCTGGTTCTTAAACAGCTCAGCCAGCCAGCTGCGTCCGTCAGCC 2484  
 873/1-4834 2223 ---AGTGTGGCAACCTTCTGTGCTCTCCACACACAAATAACCAAAATAAATTTA-----TTTCAGAAAACCAAGATCCAAATCACAATAGCTTAATTTCT-----GCATACA 2328  
 K13/1-4364 2196 ---AGTGTGGCAACCTTCTGTGCTCTCCACACACAAATAACCAAAATAAATTTA-----TTTCAGAAAACCAAGATCCAAATCACAATAGCTTAATTTCT-----GCATACA 2301

873/1-4834 2485 GACCCAGCTGGCTCGATCCATCCCTAACTTCACTATGGCAGAGAAAAGGTATATTTATTTATTTATCTGCGCGC-----AGCATCGCTCTAGAAATGTCCTTTCTCTCTTAAAAAA 2606  
 873/1-4834 2329 TACACAAAGAGTCTCTCTC-----GCCATG---TTTATCTGCAAGACAGGATTTGGTTATAAG-----TTTTCTCGGCA---TCACATGCTCGAATCTCAATCGCA 2438  
 K13/1-4364 2302 G-----TCCGATGCC-----CATATGACATACAACTCTTAAATTAATTAATAAATAATACACTCCATGAACAAAGCATGACCAAACTCAGCAAGGACATGTTGACATC 2411

873/1-4834 2607 ACCCCCAATAGCTGATGGATGATCAGCGCTAAAATTTTTATAAATAAGCACTAAATATTTCTTTATAAATAATATTAAGATTTTAAATAATTTAGTAAAAATAAATAAATAGCTCGTCA 2740  
 873/1-4834 2439 TACACAAAGAGTCTCTCTC-----GCCATG---TTTATCTGCAAGACAGGATTTGGTTATAAG-----TTTTCTCGGCA---TCACATGCTCGAATCTCAATCGCA 2539  
 K13/1-4364 2412 TCAACAAAGAGTCTCTCTC-----GCCATG---TTTATCTGCAAGACAGGATTTGGTTATAA-----TTTTCTCGGCA---TCACATGCTCGAATCTCAATCGCA 2512

873/1-4834 2741 TCCATCTTAAATGTTATAAATAAATAAATAAATAAATAAATAAATAAATAAATAAATAAATAAATAAATAAATAAATAAATAAATAAATAAATAAATAAATAAATAAATAAATAAATA 2874  
 873/1-4834 2639 TCACTCTCTCGA-----ATAAATTTGAAAGCCATAG--ATGCAAAATAATCTAGTTTCTTCTCCCTCAAAAAATCTTTG-----ATGTTCAACAAAATCCCTAA 2638  
 K13/1-4364 2513 TCACTCTCTCGA-----ATAAATTTGAAAGCCATAG--ATGCAAAATAATCTAGTTTCTTCTCCCTCAAAAAATCTTTG-----ATGTTCAACAAAATCCCTAA 2611

873/1-4834 2875 AAAAAACCTGGACACTCACTACAGGCTAGCTGCCAACAATCCCTTAACTACCTTAAATAGATCTATACCTAATGCTTACACAGCAAAAATTAATAAATTAATTCAGACAAACCAAGCA 3008  
 873/1-4834 2639 TCACTCTCTCGA-----ATAAATTTGAAAGCCATAG--ATGCAAAATAATCTAGTTTCTTCTCCCTCAAAAAATCTTTG-----ATGTTCAACAAAATCCCTAA 2638  
 K13/1-4364 2612 G--TTCATCTTCAACCTCAAAAATCTTTCT--ATCACAATTTTAACTTGGCATGTCAGTGTGAAGACTTTTTCATACCT--TGGCAAAAACAAACCTTTCTTTCTTCCAGT--G 2735

873/1-4834 3009 TATAGATATATACCCTAAATACAGCAATGCTGTCAGCAAAAGTTAGATCAGGCTGCTATAGGGCTAGGAGACATGCAATAGTACTTAAACACTTAAAGAGGTTTACCAATTTATCTAAAGATA 3142  
 873/1-4834 2763 GCGCAGCTGCTCCCTCCACTACTTTCATGGATCAAGAAAAGAGGAGAGGAG-----GCTGAGGAAAGGAGGAGGAGGAGGAGGAGGAGGAGGAGGAGGAGGAGGAGGAGGAGGAGGAG 2888  
 K13/1-4364 2736 GCGCAGCTGCTCCCTCCACTACTTTCATGGATCAAGAAAAGAGGAGAGGAG-----GCTGAGGAAAGGAGGAGGAGGAGGAGGAGGAGGAGGAGGAGGAGGAGGAGGAGGAGGAGGAG 2861

873/1-4834 3143 TAACCTTATGAGCACTTACTAAATTAATCATAGTAAACATTTTTTTCTTAATAAATCTATTTAGCAGCATAAATGTTTAACTGTTTCCCTGTAATTTCTGACACAGAAACCTCCGAAATCTAA 3276  
 873/1-4834 2889 GAAAA-----AAAACCGACCGAGAACTCCGGATCCCTCCGGAAATAAAGAGAAAAAGGA-----TTTTGGTGGTCTTCAAGAAAATAGCCCTAA-----GAA 2988  
 K13/1-4364 2862 GAAAA-----AAAACCGACCGAGAACTCCGGATCCCTCCGGAAATAAAGAGAAAAAGGA-----TTTTGGTGGTCTTCAAGAAAATAGCCCTAA-----GAA 2961



promoter in *Bif3*, *Ki3* and *B73*. Partial section (*B73* region coordinates -4,978 to -144 from *ZmWUS1* start site). Alignment visualized in Jalview (version 2.11.1.3) <sup>1</sup>.



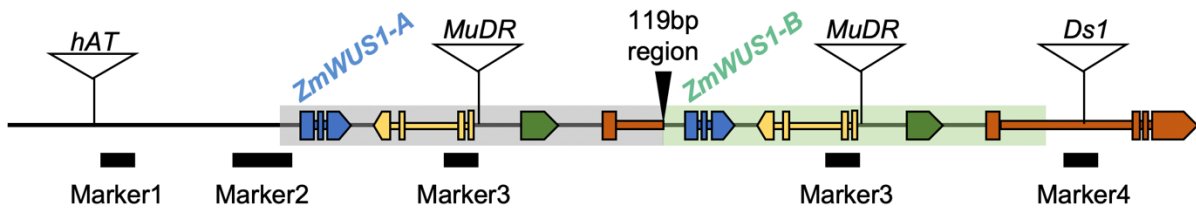

| Revertant | Marker1          | Marker2          | ZmWUS1-A | Marker3          | MuDR | ZmWUS1-B          | Marker4          | phenotype |
|-----------|------------------|------------------|----------|------------------|------|-------------------|------------------|-----------|
| Rev1      | <i>Bif3/Bif3</i> | <i>Bif3/Bif3</i> | +        | <i>Bif3/Bif3</i> | +    | +                 | <i>Bif3/Bif3</i> | WT        |
|           |                  |                  |          |                  |      | (G -> A)          |                  |           |
| Rev2      | <i>Bif3/Bif3</i> | <i>Bif3/Bif3</i> | +        | <i>Bif3/Bif3</i> | +    | +                 | <i>Bif3/Bif3</i> | WT        |
|           |                  |                  |          |                  |      | (longer promoter) |                  |           |
| Rev3      | <i>Bif3/Bif3</i> | <i>Bif3/Bif3</i> | +        | <i>Bif3/Bif3</i> | +    | -                 | <i>Bif3/Bif3</i> | WT        |
| Rev4      | <i>Bif3/Bif3</i> | <i>Bif3/Bif3</i> | +        | <i>Bif3/Bif3</i> | +    | -                 | <i>Bif3/Bif3</i> | WT        |
| Rev5      | <i>Bif3/Bif3</i> | <i>Bif3/Bif3</i> | +        | <i>Bif3/Bif3</i> | +    | -                 | <i>Bif3/Bif3</i> | WT        |
| Rev6      | <i>Bif3/Bif3</i> | <i>Bif3/Bif3</i> | +        | <i>Bif3/Bif3</i> | +    | -                 | <i>Bif3/Bif3</i> | WT        |
| Rev7      | <i>Bif3/Bif3</i> | <i>Bif3/Bif3</i> | +        | <i>Bif3/Bif3</i> | +    | -                 | <i>Bif3/Bif3</i> | WT        |
| Rev8      | <i>Bif3/Bif3</i> | <i>Bif3/Bif3</i> | +        | <i>Bif3/Bif3</i> | +    | -                 | <i>Bif3/Bif3</i> | WT        |
| Rev9      | <i>Bif3/Bif3</i> | <i>Bif3/Bif3</i> | +        | <i>Bif3/Bif3</i> | +    | -                 | <i>Bif3/Bif3</i> | WT        |
| Rev10     | <i>Bif3/Bif3</i> | <i>Bif3/Bif3</i> | +        | <i>Bif3/Bif3</i> | +    | -                 | <i>Bif3/Bif3</i> | WT        |
| Rev11     | <i>Bif3/Bif3</i> | <i>Bif3/Bif3</i> | +        | <i>Bif3/Bif3</i> | +    | -                 | <i>Bif3/Bif3</i> | WT        |
| Rev12     | <i>Bif3/Bif3</i> | <i>Bif3/Bif3</i> | +        | <i>Bif3/Bif3</i> | +    | -                 | <i>Bif3/Bif3</i> | WT        |
| Rev13     | <i>Bif3/Bif3</i> | <i>Bif3/Bif3</i> | +        | <i>Bif3/Bif3</i> | +    | -                 | <i>Bif3/Bif3</i> | WT        |
| Rev14     | <i>Bif3/Bif3</i> | +/ <i>Bif3</i>   | +        | +/ <i>Bif3</i>   | +    | -                 | +/ <i>Bif3</i>   | WT        |
| Rev15     | <i>Bif3/Bif3</i> | <i>Bif3/Bif3</i> | +        | <i>Bif3/Bif3</i> | +    | -                 | <i>Bif3/Bif3</i> | WT        |
| Rev16     | <i>Bif3/Bif3</i> | <i>Bif3/Bif3</i> | +        | <i>Bif3/Bif3</i> | +    | -                 | <i>Bif3/Bif3</i> | WT        |
| Rev17     | <i>Bif3/Bif3</i> | <i>Bif3/Bif3</i> | +        | <i>Bif3/Bif3</i> | +    | -                 | <i>Bif3/Bif3</i> | WT        |
| Rev18     | <i>Bif3/Bif3</i> | <i>Bif3/Bif3</i> | +        | <i>Bif3/Bif3</i> | +    | -                 | <i>Bif3/Bif3</i> | WT        |
| Rev19     | <i>Bif3/Bif3</i> | <i>Bif3/Bif3</i> | +        | <i>Bif3/Bif3</i> | +    | -                 | <i>Bif3/Bif3</i> | WT        |
| Rev20     | <i>Bif3/Bif3</i> | <i>Bif3/Bif3</i> | +        | <i>Bif3/Bif3</i> | +    | -                 | <i>Bif3/Bif3</i> | WT        |

**Supplementary Figure 4.** Genotyping of the *Bif3* locus in different revertant individuals. Each original M1 revertant was self-crossed and homozygous *Bif3/Bif3* plants were selected based on Marker 1 for genotyping with additional markers spanning the entire region. Details on the markers used are provided in Supplementary Data 2.

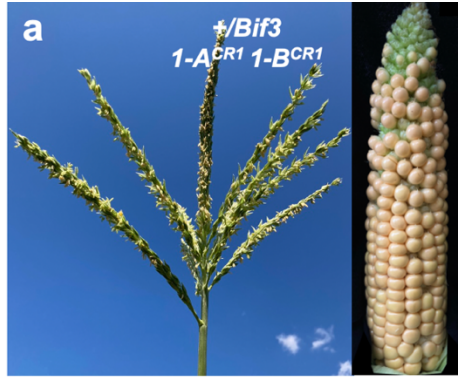

**ZmWUS1-A<sup>CR1</sup>** CCTTGG-GTCCTCTCGTTGTCGCCTTCAGGTTGTTTCAGgtatatgtacc  
 |||||  
**ZmWUS1** CCTTGGCGTCCTCTCGTTGTCGCCTTCAGGTTGTTTCAGgtatatgtacc  
 |||||  
**ZmWUS1-B<sup>CR1</sup>** CCTTG-CGTCATCATCA-----cc

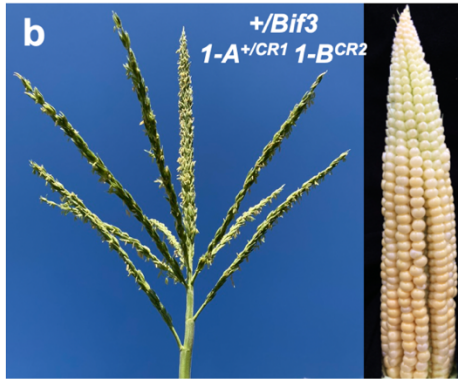

**ZmWUS1-A<sup>CR1</sup>** CCTTGG-GTCCTCTCGTTGTCGCCTTCAGGTTGTTTCAG  
 |||||  
**ZmWUS1** CCTTGGCGTCCTCTCGTTGTCGCCTTCAGGTTGTTTCAG  
 |||||  
**ZmWUS1-B<sup>CR2</sup>** CCTTGG--TCCTCTCGTTGTCGCCTTCAGGTTGTTTCAG

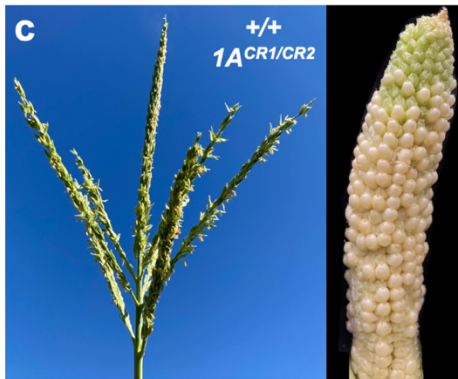

**ZmWUS1-A<sup>CR2</sup>** CCTT-----CTTCAGGTTGTTTCAG  
 |||||  
**ZmWUS1-A<sup>CR1</sup>** CCTTGG-GTCCTCTCGTTGTCGCCTTCAGGTTGTTTCAG  
 |||||  
**ZmWUS1-A** CCTTGGCGTCCTCTCGTTGTCGCCTTCAGGTTGTTTCAG

**Supplementary Figure 5.** CRISPR-Cas9 loss-of-function *ZmWUS1-A* and *ZmWUS1-B* alleles. Additional knockout events in both genes in *Bif3* mutant (a,b) and wild type (c) plants show a wild type phenotype in both tassels and ears. Events are homozygous, unless otherwise noted.

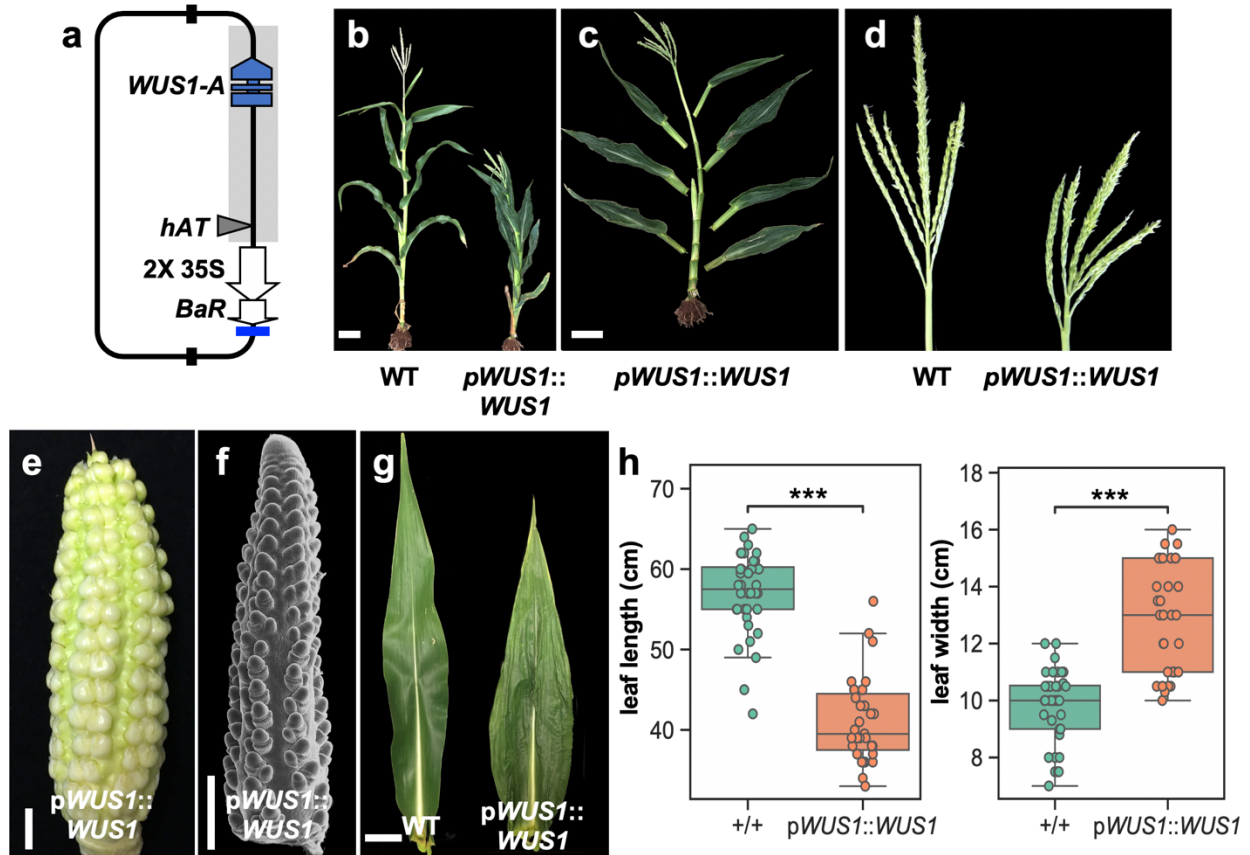

**Supplementary Figure 6.** Analysis of *pWUS1-A::ZmWUS1-A* transgenic plants. (a) Binary *pZmWUS1-A::ZmWUS1-A* construct used for transformation. (b,c) *pWUS1-A* transgenic plants are shorter and more compact. (d) Normal tassels of *pWUS1-A* transgenic plants. (e) Normal ear appearance of *pWUS1-A* transgenic plants. (f) SEM image of *pWUS1-A* transgenic ear primordia. (g,h) *pWUS1-A* transgenic plants have wider and shorter leaves ( $n_{WT} = 36$ ,  $n_{pWUS1-A} = 31$ , two-tailed Student's *t*-test, \*\*\* $p < 0.001$ ). Box plot center line, median; box limits, upper and lower quartiles; whiskers, maximum and minimum values. Single datapoints outside of the whiskers represent outliers. Bars: 10cm in **b** and **c**, 1cm in **e**, 500 $\mu$ m in **f**, 5cm in **g**.

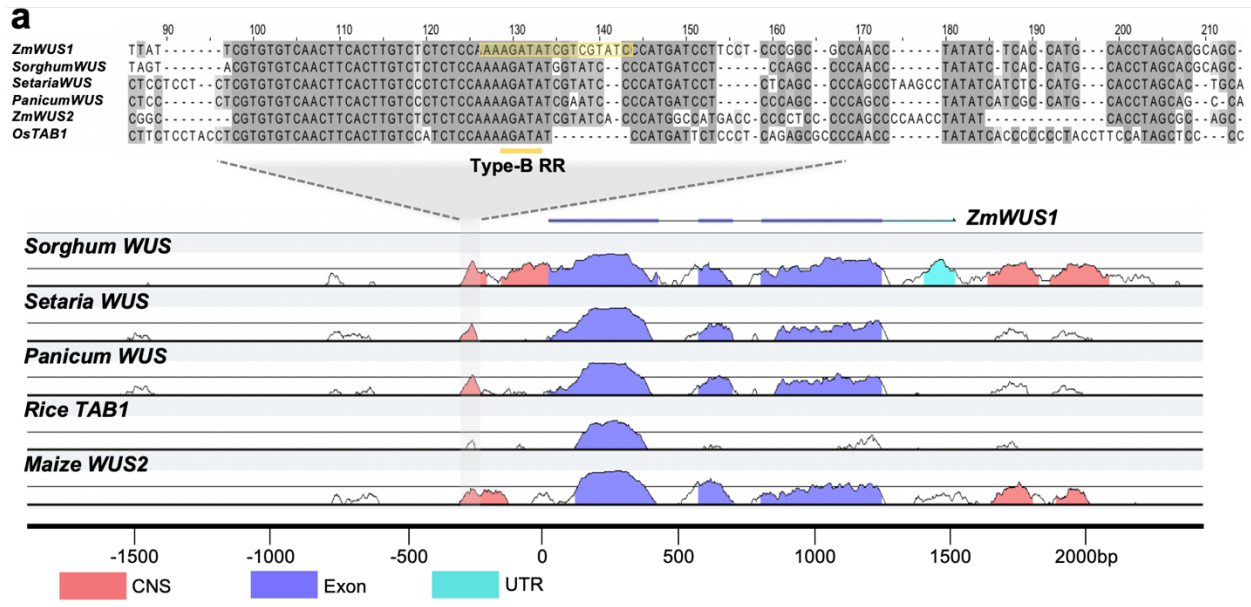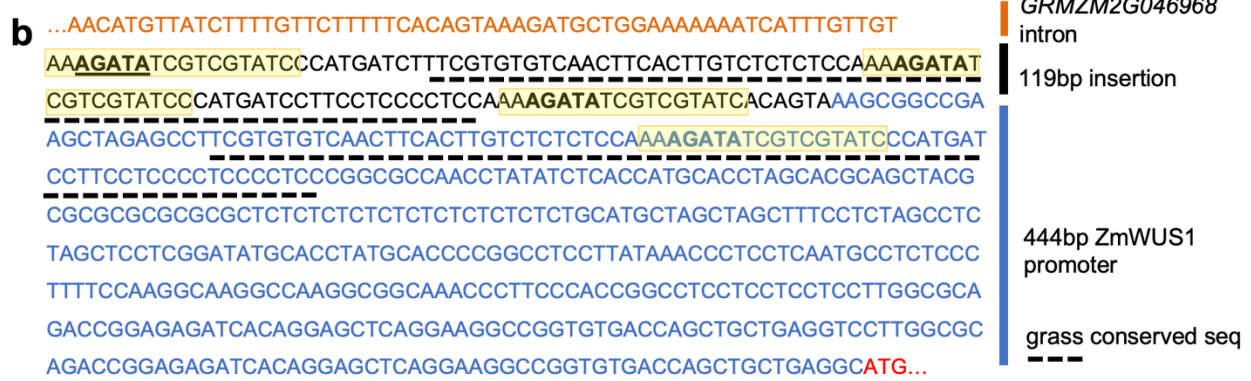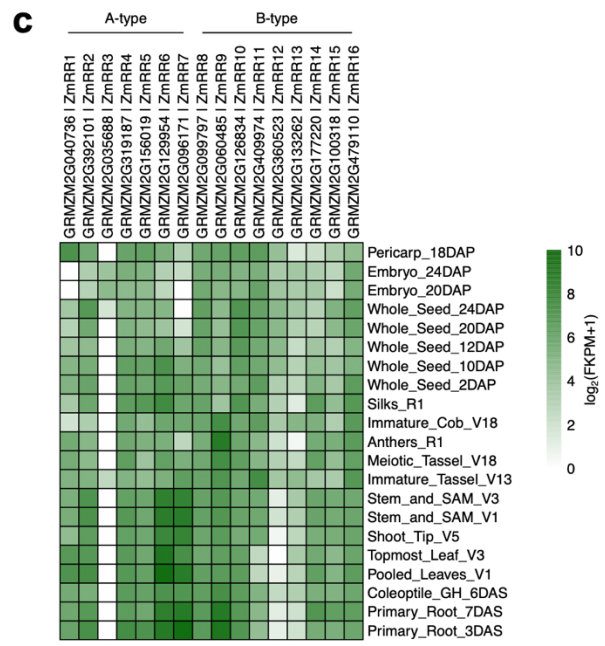

**Supplementary Figure 7.** Conservation of type-B RR binding sites in the promoter of *WUS* in different species. **(a)** Alignment of the conserved region in the proximal promoter region of the *WUS1* gene in different grass species. In yellow is the 17bp element repeated in the unique 119bp region of the *Bif3* mutant. **(b)** Proximal promoter sequence of the *ZmWUS1-B* gene in *Bif3* mutants. **(c)** RNA-seq expression levels of *ZmRR* genes in different tissues, from Stelpflug et al. 2016 <sup>2</sup>.



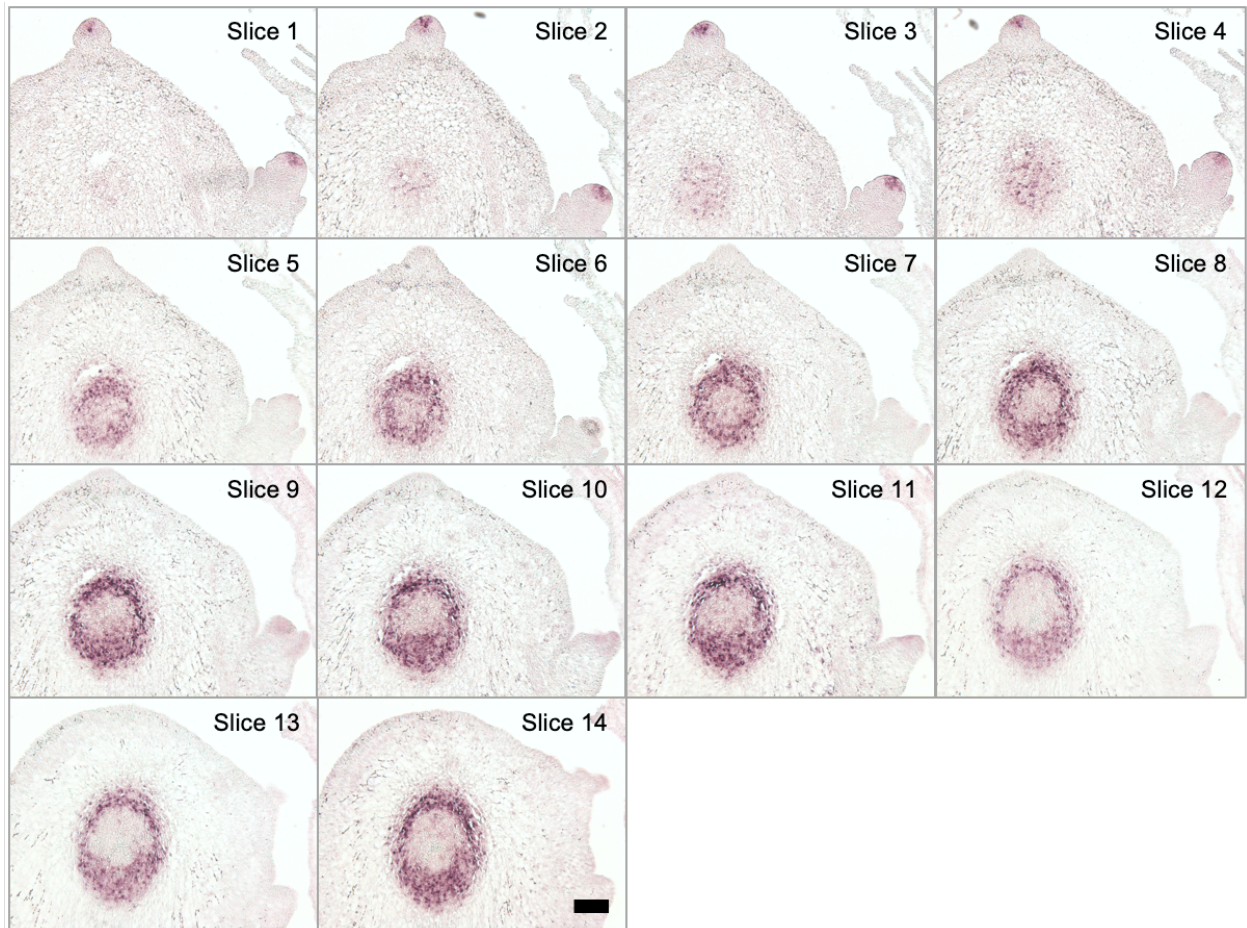

**Supplementary Figure 8.** RNA *in situ* hybridizations. *ZmWUS1* antisense probe used on consecutive longitudinal sections of ear primordia show a hollow spherical expression domain in *Bif3* inflorescence meristem (A619 background). Bar: 100  $\mu$ m.

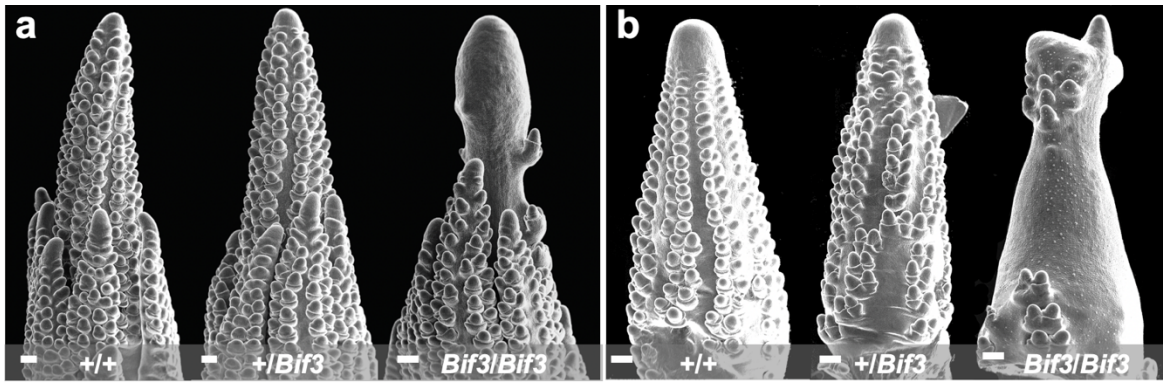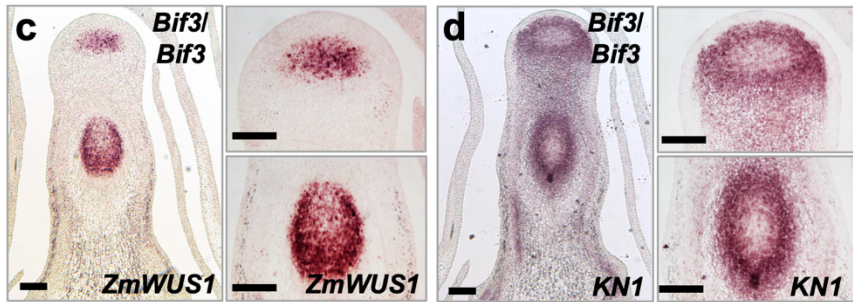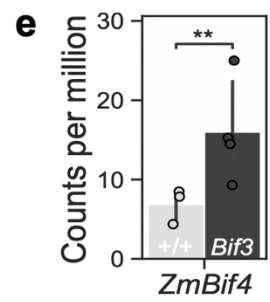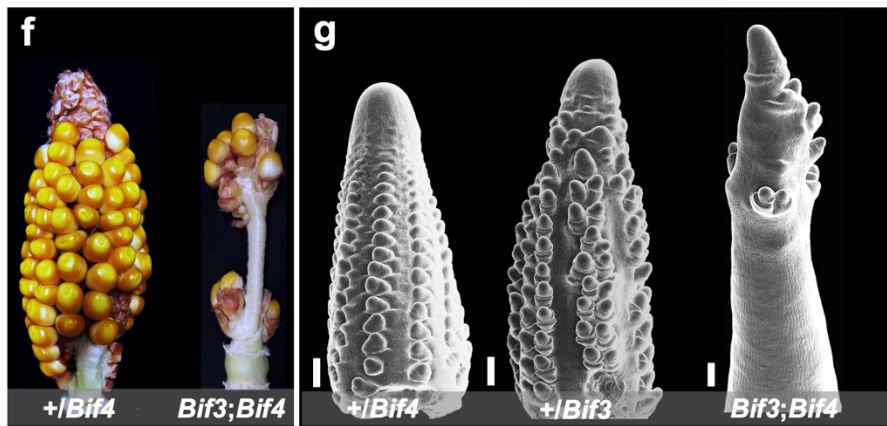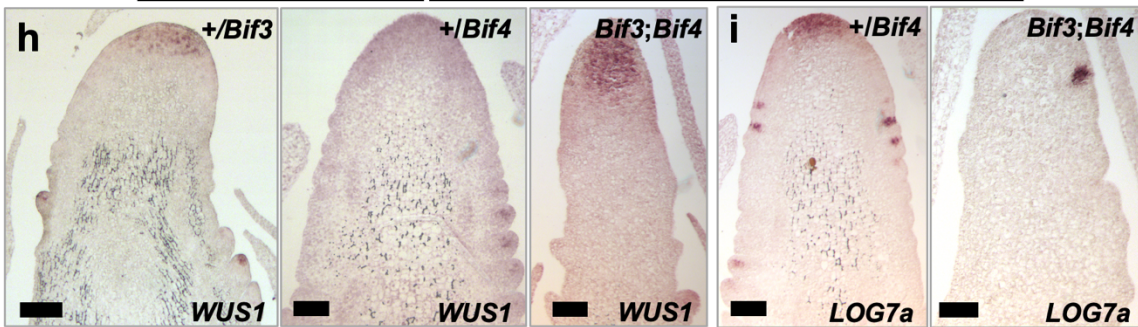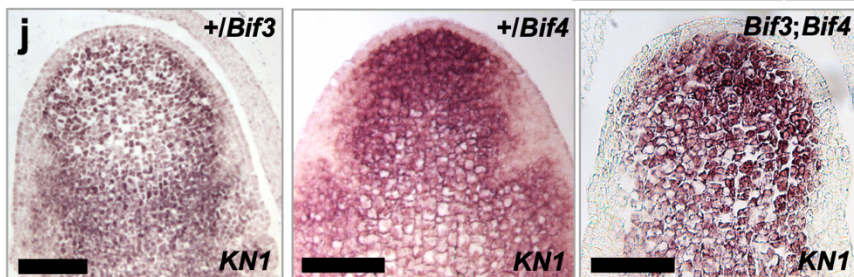



**Supplementary Figure 9.** *Bif3* mutant phenotype in the B73 background and genetic interaction between *Bif3* and *Bif4* mutants. **(a,b)** SEMs of wild-type and *Bif3* tassel **(a)** and ear **(b)** primordia. *Bif3* inflorescences shows reduced number of SPMs and single SMs. **(c,d)** mRNA *in situ* hybridizations of *ZmWUS1* **(c)** and *KN1* **(d)** in *Bif3/Bif3* inflorescence meristems show two OC domains. **(e)** The *BIF4* gene is upregulated about 1.7-fold in *Bif3* ear primordia; two-tailed Student's *t*-test \*\* $p < 0.01$ ; plotted data represent the mean, +/- standard deviation;  $n_{+/+}=3$ ,  $n_{Bif3/Bif3}=4$  ( $n$  pools of three ear samples). **(f,g)** Enhanced *Bif3* ear phenotype in heterozygous *Bif3;Bif4* double mutants. **(h-j)** Expression pattern of *ZmWUS1*, *ZmLOG7a* and *KN1* in *Bif3* heterozygous and *Bif3;Bif4* double mutants. Scale bars: 200  $\mu\text{m}$  in **a, b, g**; 100  $\mu\text{m}$  in **c, d, h, i**.

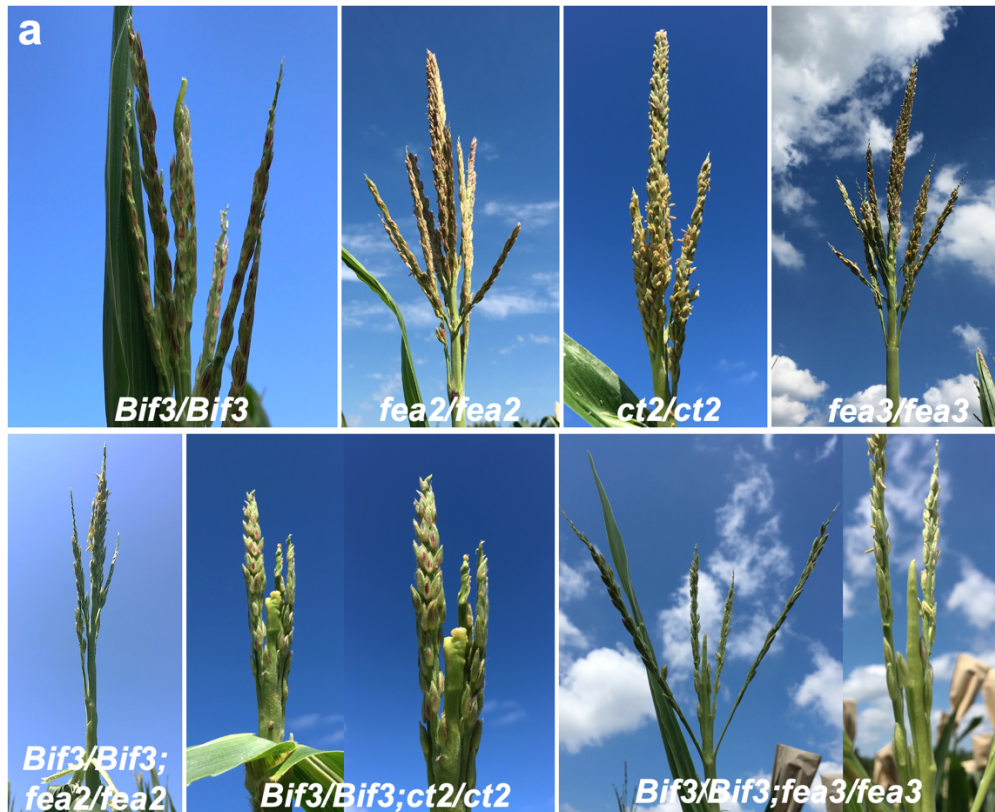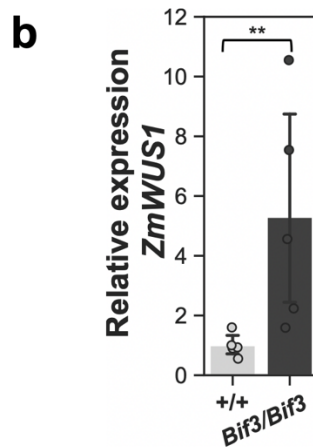

**Supplementary Figure 10.** Double mutant analysis. Mature tassel phenotype in single and double mutant combinations of *Bif3* and different fasciated mutants. The central spike is particularly reduced in length in *Bif3/Bif3;ct2/ct2* and *Bif3/Bif3;fea3/fea3* mutants ( $n \geq 8$ ) (b) qRT-PCR showing *ZmWUS1* overexpression in developing embryos 12 days after pollination. Two-tailed Student's t-test  $**p < 0.01$ ; plotted data represent the mean,  $\pm$  standard deviation;  $n_{+/+}=5$ ,  $n_{Bif3/Bif3}=5$  ( $n$  pools of three ear samples).

## REFERENCES

1. Waterhouse, A.M. *et al.* Jalview Version 2--a multiple sequence alignment editor and analysis workbench. *Bioinformatics* **25**, 1189-91 (2009).
2. Stelpflug, S.C. *et al.* An Expanded Maize Gene Expression Atlas based on RNA Sequencing and its Use to Explore Root Development. *Plant Genome* **9**(2016).
