# Supplementary material for: Structural variation at the maize WUSCHEL1 locus alters stem cell organization in inflorescences
Source: PubMed Central journal article supplement (PMC8062686; doi:10.1038/s41467-021-22699-8), 2021-04-22
Supplement: 41467_2021_22699_MOESM3_ESM.pdf [file 41467_2021_22699_MOESM3_ESM.pdf]

Descriptions of Additional Supplementary Files

**Supplementary Data 1**

**Description:** List of DEGs by RNA-seq analysis of Bif3 ear primordia.

**Supplementary Data 2**

**Description:** List of molecular markers, primers and in situ probes used in this study.
